# Supplementary material
Source: ML conference proceedings conference paper supplement (https://openreview.net/forum?id=sWOsRj4nT1n)
Supplement: supplementary_material [file attachment]

## Sheet: Sheet1
0	670	670
1	672	1342
2	672	2014
3	672	2686
4	671	3357
5	672	4029
6	672	4701
7	672	5373
8	672	6045
9	672	6717
10	672	7389
11	672	8061
12	672	8733
13	672	9405
14	672	10077
15	672	10749
16	672	11421
17	672	12093
18	672	12765
19	672	13437
20	672	14109
21	672	14781
22	672	15453
23	672	16125
24	672	16797
25	672	17469
26	672	18141
27	672	18813
28	672	19485
29	672	20157
30	672	20829
31	672	21501
32	672	22173
33	672	22845
34	672	23517
35	672	24189
36	672	24861
37	672	25533
38	672	26205
39	672	26877
40	672	27549
	27549
